# Supplementary material for: Identification of Novel High-Frequency DNA Methylation Changes in Breast Cancer
Source: PubMed Central journal article supplement (PMC2117343; doi:10.1371/journal.pone.0001314), 2007-12-19
Supplement: pone.0001314.s001.pdf [file pone.0001314.s001.pdf]

**Figure S1.**

|               | <b>ORIGINAL</b> | <b>REP1</b>  | <b>REP2</b>  | <b>REP3</b>  |
|---------------|-----------------|--------------|--------------|--------------|
| <b>TUMOR</b>  | <b>0.75</b>     | <b>0.755</b> | <b>0.905</b> | <b>1.12</b>  |
| <b>TUMOR</b>  | <b>0.835</b>    | <b>2.67</b>  | <b>2.53</b>  | <b>2.63</b>  |
| <b>TUMOR</b>  | <b>0.915</b>    | <b>2.255</b> | <b>1.715</b> | <b>1.65</b>  |
| <b>TUMOR</b>  | <b>1.115</b>    | <b>1.265</b> | <b>1.27</b>  | <b>1.325</b> |
| <b>TUMOR</b>  | <b>1.125</b>    | <b>1.565</b> | <b>1.59</b>  | <b>1.585</b> |
| <b>TUMOR</b>  | <b>1.13</b>     | <b>1.495</b> | <b>1.54</b>  | <b>1.565</b> |
| <b>TUMOR</b>  | <b>1.22</b>     | <b>1.23</b>  | <b>1.375</b> | <b>1.295</b> |
| <b>TUMOR</b>  | <b>1.225</b>    | <b>1.84</b>  | <b>1.625</b> | <b>1.665</b> |
| <b>TUMOR</b>  | <b>1.41</b>     | <b>1.895</b> | <b>1.705</b> | <b>1.59</b>  |
| <b>TUMOR</b>  | <b>1.5</b>      | <b>1.71</b>  | <b>1.7</b>   | <b>1.61</b>  |
| <b>TUMOR</b>  | <b>1.335</b>    | <b>1.5</b>   | <b>1.46</b>  | <b>1.47</b>  |
| <b>NORMAL</b> | <b>0.545</b>    | <b>0</b>     | <b>0</b>     | <b>0</b>     |
| <b>NORMAL</b> | <b>0.71</b>     | <b>0.03</b>  | <b>0</b>     | <b>0.1</b>   |
| <b>NORMAL</b> | <b>0.805</b>    | <b>0.305</b> | <b>0.275</b> | <b>0.33</b>  |
| <b>NORMAL</b> | <b>0.805</b>    | <b>0</b>     | <b>0</b>     | <b>0.25</b>  |
| <b>NORMAL</b> | <b>0.525</b>    | <b>0.46</b>  | <b>0.55</b>  | <b>0.61</b>  |
